# Supplementary material
Source: publisher figshare collection journal article supplement (https://acs.figshare.com/ndownloader/files/7648183)
Supplement: Supplementary file 1 [file 7648183]

**Development of a QuEChERS-Based Method for the Determination  
of Carcinogenic 2-Nitrofluorene and 1-Nitropyrene in Rice Grains  
and Vegetables: A Comparative Study with Benzo[*a*]pyrene**

Kailin Deng<sup>†</sup> and Wan Chan <sup>\*,†,‡</sup>

<sup>†</sup> Environmental Science Programs and <sup>‡</sup> Department of Chemistry, The Hong Kong  
University of Science and Technology, Clear Water Bay, Kowloon, Hong Kong

\* Corresponding author (Tel: +852 2358-7370; Fax: +852-2358-1594; E-mail:  
chanwan@ust.hk)

**Table S1.** Linear Regression Parameters of the Calibration Curves and Limit of Quantitation (LOQ) of the Developed HPLC-FLD Method.

| NPAHs/PAHs              | Log $K_{ow}$ <sup>a</sup> | TEF <sup>b</sup> | Linear range<br>(mg/L) | $R^2$  | LOQ<br>(μg/L) | LOQ <sub>m</sub> <sup>c</sup><br>(μg/kg) | LOD <sub>m</sub><br>(μg/kg) |
|-------------------------|---------------------------|------------------|------------------------|--------|---------------|------------------------------------------|-----------------------------|
| 2-Nitrofluorene         | 3.37                      | 0.01             | 0.005–1.01             | 0.9995 | 4.3           | 0.43                                     | 0.12                        |
| 1-Nitropyrene           | 4.69                      | 0.1              | 0.005-1.00             | 0.9994 | 2.5           | 0.25                                     | 0.08                        |
| Benzo[ <i>a</i> ]pyrene | 6.30                      | 1                | 0.005-1.02             | 0.9996 | 1.6           | 0.16                                     | 0.05                        |

<sup>a</sup> Log  $K_{ow}$  is the octanol-water partition coefficient. <sup>b</sup>TEF is the toxicity equivalency

factors. <sup>c</sup> The LOQ<sub>m</sub> is the sample extract based on 10 g of sample.

**Table S2.** Comparison of d-SPE-Based QuEChERS Extraction Method with SPE Method for Rice and Vegetable Analysis.

|                         | QuEChERS method |            |           | SPE method |            |           |
|-------------------------|-----------------|------------|-----------|------------|------------|-----------|
|                         | Rice            | Celery     | Cabbage   | Rice       | Celery     | Cabbage   |
| 2-Nitrofluorene         | 0.69±0.03       | <LOQ       | ND        | 0.78±0.04  | ND         | ND        |
| 1-Nitropyrene           | <LOQ            | 25.27±2.37 | 0.51±0.07 | <LOQ       | 25.42±2.32 | 0.45±0.02 |
| Benzo[ <i>a</i> ]pyrene | 0.22±0.01       | 0.34±0.12  | <LOQ      | 0.21±0.00  | 0.49±0.08  | ND        |

The data represent mean ± SD for three independent determinations.

**Table S3.** Mean LB and UB Concentrations for 2-Nitrofluorene, 1-Nitropyrene, and Benzo[*a*]pyrene in each Food Categories (µg/kg).

|                          | <b>2-Nitrofluorene</b> |      | <b>1-Nitropyrene</b> |      | <b>Benzo[<i>a</i>]pyrene</b> |      |
|--------------------------|------------------------|------|----------------------|------|------------------------------|------|
|                          | LB                     | UB   | LB                   | UB   | LB                           | UB   |
| <b><i>Rice</i></b>       | 0.82                   | 0.88 | 0.49                 | 0.53 | 0.39                         | 0.43 |
| <b><i>Vegetable</i></b>  | 0.38                   | 0.51 | 0.46                 | 0.49 | 0.33                         | 0.36 |
| <i>root and tuberous</i> | 0.60                   | 0.63 | 0.78                 | 0.78 | 0.48                         | 0.48 |
| <i>fruit</i>             | 0.86                   | 0.94 | 0.48                 | 0.50 | 0.36                         | 0.41 |
| <i>bulb and stem</i>     | 0.02                   | 0.22 | 0.24                 | 0.34 | 0.44                         | 0.44 |
| <i>leafy</i>             | 0.02                   | 0.22 | 0.31                 | 0.35 | 0.15                         | 0.19 |

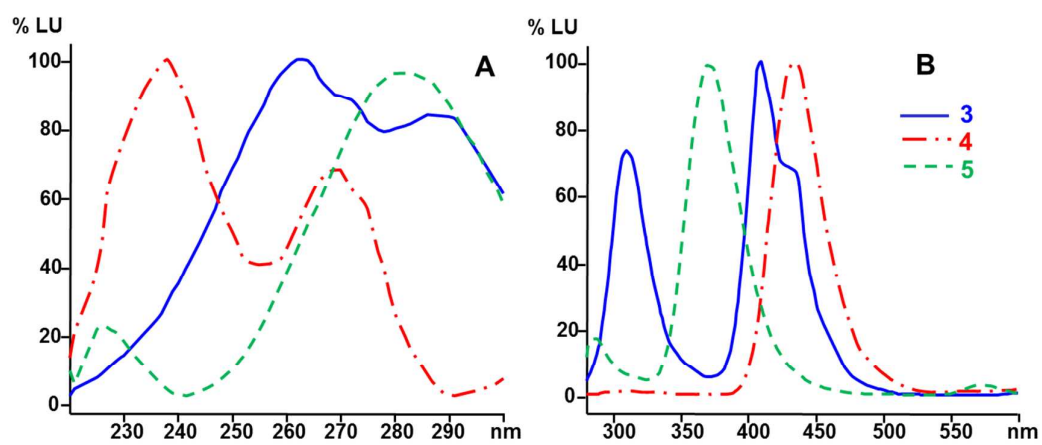

**Figure S1.** Fluorescence excitation (A) and emission (B) spectra of PAHs and the amino-PAHs formed by Fe/H<sup>+</sup>-induced nitro-reduction of nitro-PAHs.

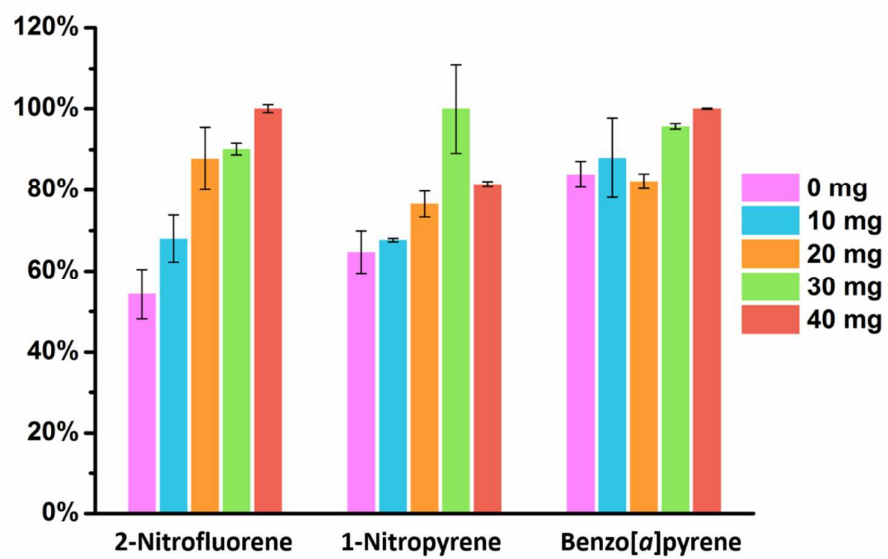

**Figure S2.** Effect of different amount of PSA on the recoveries of 2-nitrofluorene, 1-nitropyrene, and benzo[a]pyrene from sample extracts.

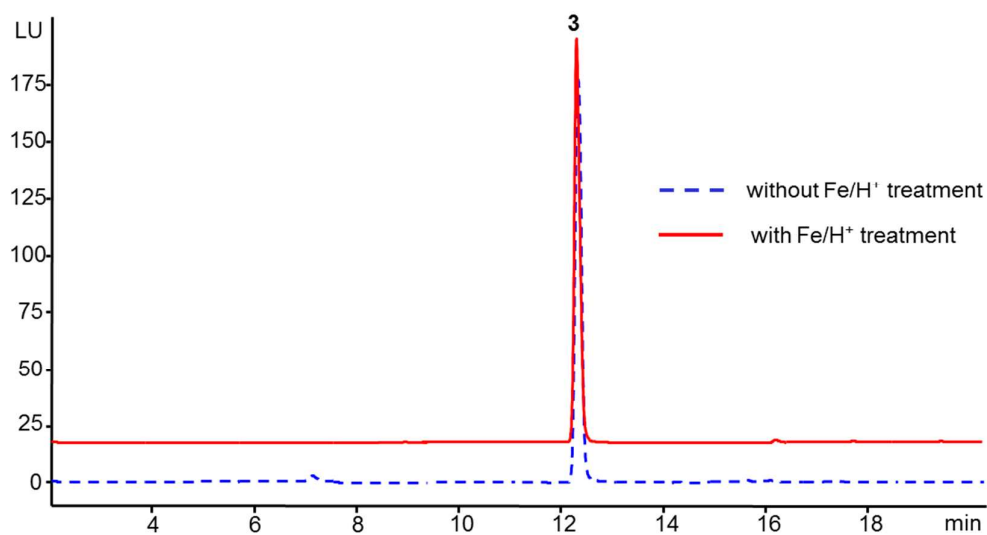

**Figure S3.** Effect of the Fe/H<sup>+</sup>-treatment on benzo[*a*]pyrene concentration. The analysis showed benzo[*a*]pyrene was unaffected as the nitro-PAHs are being reduced to fluorescing amino-PAHs by the Fe/H<sup>+</sup>-induced nitro-reduction.

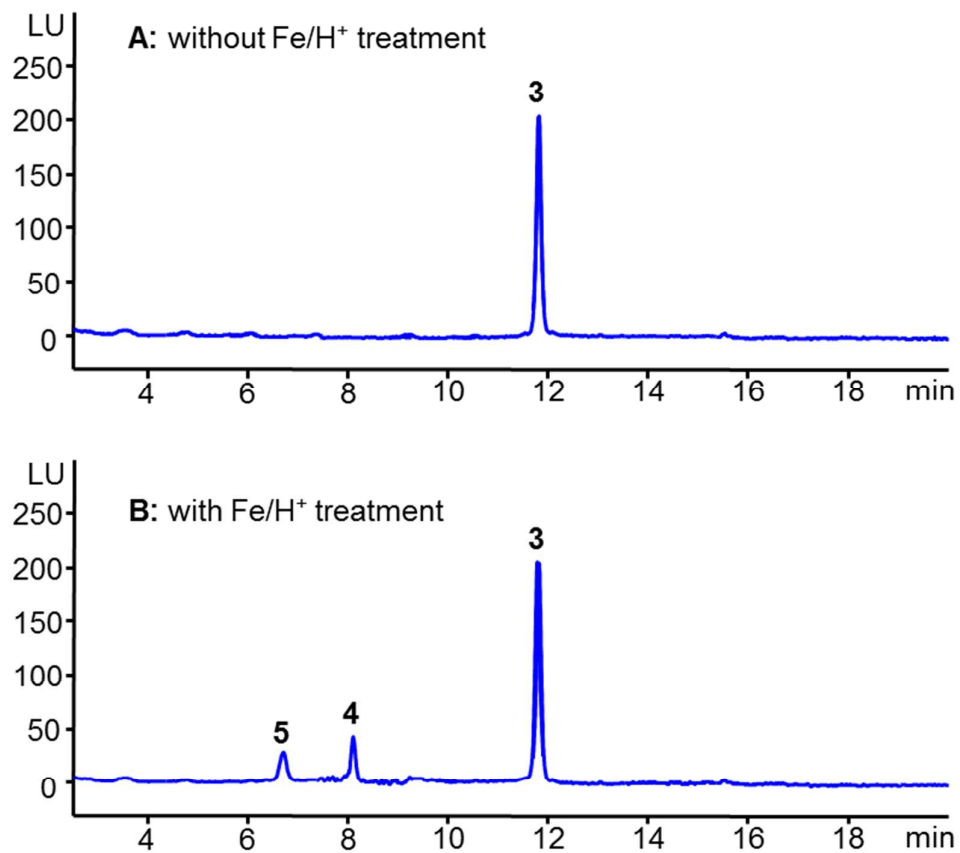

**Figure S4.** Chromatograms from HPLC-FLD analysis of vegetable sample with and without Fe/H<sup>+</sup> treatment.
